# Supplementary material for: Molecular Dynamic Simulation of Space and Earth-Grown Crystal Structures of Thermostable T1 Lipase Geobacillus zalihae Revealed a Better Structure
Source: MDPI journal article supplement (doi:10.3390/molecules22101574), 2017-09-25
Supplement: s1 [file s1]

# Molecular Dynamic Simulation of space-grown and earth-grown crystal structures of thermostable T1 lipase *Geobacillus zalihae* revealed a better structure.

Siti Nor Hasmah Ishak<sup>1</sup>, Sayangku Nor Ariati Mohamad Aris<sup>1,3</sup>, Khairul Bariyyah Abd Halim<sup>7</sup>, Mohd Shukuri Mohamad Ali<sup>1,4</sup>, Thean Chor Leow<sup>1,3,5</sup>, Nor Hafizah Ahmad Kamarudin<sup>1,3</sup>, Malihe Masomian<sup>1,2</sup> and Raja Noor Zaliha Raja Abd. Rahman<sup>1,2,5,6,\*</sup>

<sup>1</sup> Enzyme and Microbial Technology Research Centre, Faculty of Biotechnology and Biomolecular Sciences, Universiti Putra Malaysia, 43400 UPM Serdang, Selangor, Malaysia.

<sup>2</sup> Department of Microbiology, Faculty of Biotechnology and Biomolecular Sciences, Universiti Putra Malaysia, 43400 UPM Serdang, Selangor, Malaysia.

<sup>3</sup> Department of Cell and Molecular Biology, Faculty of Biotechnology and Biomolecular Sciences, Universiti Putra Malaysia, 43400 UPM Serdang, Selangor, Malaysia.

<sup>4</sup> Department of Biochemistry, Faculty of Biotechnology and Biomolecular Sciences, Universiti Putra Malaysia, 43400 UPM Serdang, Selangor, Malaysia.

<sup>5</sup> Institute of Bioscience, Universiti Putra Malaysia, 43400 UPM Serdang, Selangor, Malaysia.

<sup>6</sup> Laboratory of Halal Science Research, Halal Products Research Institute, Universiti Putra Malaysia, 43400 UPM Serdang, Selangor, Malaysia

<sup>7</sup> Kuliyyah of Science, International Islamic University Malaysia, P.O. Box 10, 50728 Kuala Lumpur, Malaysia

\* Correspondence: mnzaliha@upm.edu.my; Tel.: +603-8946-7592

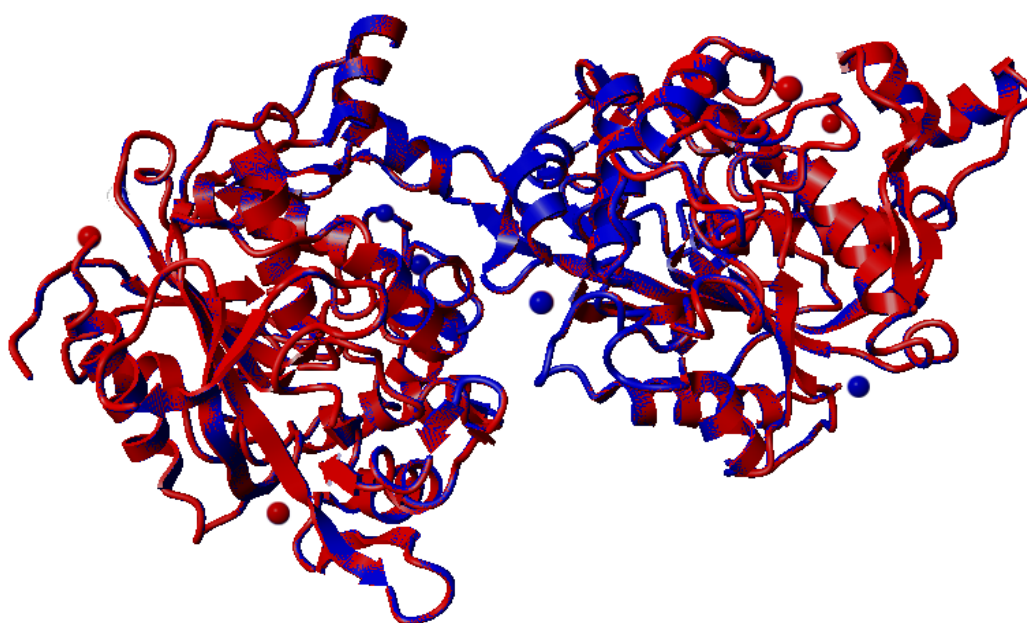

**Figure S1.** Superimposed of space-grown (blue) and ground-grown (red) T1 lipase crystal structures.

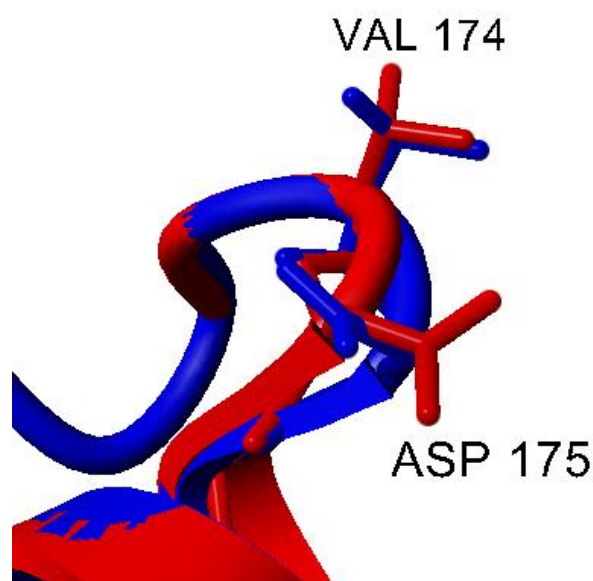

**Figure S2.** Superimposed of space-grown (blue) and ground-grown (red) of T1 lipase structure showed a region with different conformation at residue Asp175.

**Table S1.** Total number of hydrogen bond of T1 lipase space-grown and earth-grown crystal structures.

| Number of hydrogen bonds better than 6025 kJ/mol |      |
|--------------------------------------------------|------|
| Space-grown                                      | 1834 |
| Earth-grown                                      | 1800 |

**Table S2.** Different location of hydrogen bond in T1 lipase space-grown crystal compared to earth-grown crystal structures.

| Earth-grown structure   | Space-grown structure     |
|-------------------------|---------------------------|
| O Leu 208 < N Trp 211   | ND2 Asn 42 > O Thr 48     |
| N Asn 321 > OD1 Asn 321 | O Glu 250 < N Gln 254     |
| OD1 Asn 367 < N Ser 369 | O Thr 342 < NZ Lys 344    |
|                         | OD1 Asn 304 < OG1 Thr 306 |
|                         | NH1 Arg 34 > O Phe 370    |
|                         | NE2 39 Gln > OD1 Asp 43   |
|                         | OD1 Asn 59 < OG1 Thr 118  |
|                         | O Glu 226 < NH1 Arg 230   |

Hydrogen bond which are same in both structures are not shown. The symbols of > represent 'donated to' while < represent 'accepted from'.

**Table S3.** Average number of hydrogen bond between given residues in ground-grown and space-grown structures throughout 20ns of simulation.

| <b>Residues</b>   | <b>Ground-grown structure</b> | <b>Space-grown structure</b> |
|-------------------|-------------------------------|------------------------------|
| Glu250 and Gln254 | 0.16                          | 0.60                         |
| Asn304 and Thr306 | 0.03                          | 0.18                         |
| Gln39 and Asp43   | 0.59                          | 0.88                         |
| Asn59 and Thr118  | 0.43                          | 0.66                         |
